# Supplementary material
Source: Research Square preprint supplement (doi:10.21203/rs.3.rs-8997297/v1)
Supplement: Supplementary file 1 [file 26cb41d8cadc7a89631f4d09.docx]

| **Table 1**. **Search key words and terminologies for PubMed. 21.07.2025** | |
| --- | --- |
| **Search #** | * |
| #1  population | ( "Europe"[tiab] OR "Bulgaria"[tiab] OR "Bulgaria"[Affiliation] OR "Croatia"[tiab] OR "Croatia"[Affiliation] OR "Cyprus"[tiab] OR "Cyprus"[Affiliation] OR "Czech Republic"[tiab] OR "Czech Republic"[Affiliation] OR "Denmark"[tiab] OR "Denmark"[Affiliation] OR "Estonia"[tiab] OR "Estonia"[Affiliation] OR "Finland"[tiab] OR "Finland"[Affiliation] OR "France"[tiab] OR "France"[Affiliation] OR "Germany"[tiab] OR "Germany"[Affiliation] OR "Greece"[tiab] OR "Greece"[Affiliation] OR "Hungary"[tiab] OR "Hungary"[Affiliation] OR "Iceland"[tiab] OR "Iceland"[Affiliation] OR "Ireland"[tiab] OR "Ireland"[Affiliation] OR "Italy"[tiab] OR "Italy"[Affiliation] OR "Latvia"[tiab] OR "Latvia"[Affiliation] OR "Lithuania"[tiab] OR "Lithuania"[Affiliation] OR "Luxembourg"[tiab] OR "Luxembourg"[Affiliation] OR "Malta"[tiab] OR "Malta"[Affiliation] OR "Netherlands"[tiab] OR "Netherlands"[Affiliation] OR "Norway"[tiab] OR "Norway"[Affiliation] OR "Poland"[tiab] OR "Poland"[Affiliation] OR "Portugal"[tiab] OR "Portugal"[Affiliation] OR "Romania"[tiab] OR "Romania"[Affiliation] OR "Slovakia"[tiab] OR "Slovakia"[Affiliation] OR "Slovenia"[tiab] OR "Slovenia"[Affiliation] OR "Spain"[tiab] OR "Spain"[Affiliation] OR "Sweden"[tiab] OR "Sweden"[Affiliation] OR "Switzerland"[tiab] OR "Switzerland"[Affiliation] OR "United Kingdom"[tiab] OR "United Kingdom"[Affiliation] OR "England"[tiab] OR "England"[Affiliation] OR "Scotland"[tiab] OR "Scotland"[Affiliation] OR "Wales"[tiab] OR "Wales"[Affiliation] OR "Northern Ireland"[tiab] OR "Northern Ireland"[Affiliation] OR "Ukraine"[tiab] OR "Ukraine"[Affiliation] OR "Serbia"[tiab] OR "Serbia"[Affiliation] OR "Montenegro"[tiab] OR "Montenegro"[Affiliation] OR "Bosnia and Herzegovina"[tiab] OR "Bosnia and Herzegovina"[Affiliation] OR "North Macedonia"[tiab] OR "North Macedonia"[Affiliation] OR "Albania"[tiab] OR "Albania"[Affiliation] OR "Moldova"[tiab] OR "Moldova"[Affiliation] OR "Andorra"[tiab] OR "Andorra"[Affiliation] OR "Monaco"[tiab] OR "Monaco"[Affiliation] OR "San Marino"[tiab] OR "San Marino"[Affiliation] OR "Liechtenstein"[tiab] OR "Liechtenstein"[Affiliation] ) |
| AND |  |
| #2 outcome | ( thiamin[Title] OR thiamine[Title] OR anevrin[Title] OR "vitamin B1"[Title] OR ThDP[Title] OR TPP[Title] OR ThMP[Title] OR ThTP[Title] OR ETK[Title] OR "erythrocyte transketolase"[Title] OR "transketolase activity"[Title] OR αETK[Title] OR alpha-ETK[Title] OR ETKA[Title] OR "ETK activation coefficient"[Title] OR "beriberi"[Title] OR "beri beri"[Title] ) |
| 4 | **Include human studies only** |
|  |  |

| **Table 2**. **Search key words and terminologies for SCOPUS 21.07.2025** | |
| --- | --- |
| **Search #** | * |
| #1  population | ( TITLE ( thiamin OR thiamine OR anevrin OR "vitamin B1" ) AND TITLE ( status OR deficiency OR beriberi OR "beri beri" OR ThDP OR TPP OR ThMP OR ThTP OR ETK OR "erythrocyte transketolase" OR "transketolase activity" OR ETKA ) ) ( LIMIT-TO ( AFFILCOUNTRY , "Russian Federation" ) OR LIMIT-TO ( AFFILCOUNTRY , "Poland" ) OR LIMIT-TO ( AFFILCOUNTRY , "United Kingdom" ) OR LIMIT-TO ( AFFILCOUNTRY , "Germany" ) OR LIMIT-TO ( AFFILCOUNTRY , "France" ) OR LIMIT-TO ( AFFILCOUNTRY , "Italy" ) OR LIMIT-TO ( AFFILCOUNTRY , "Spain" ) OR LIMIT-TO ( AFFILCOUNTRY , "Netherlands" ) OR LIMIT-TO ( AFFILCOUNTRY , "Switzerland" ) OR LIMIT-TO ( AFFILCOUNTRY , "Belgium" ) OR LIMIT-TO ( AFFILCOUNTRY , "Sweden" ) OR LIMIT-TO ( AFFILCOUNTRY , "Denmark" ) OR LIMIT-TO ( AFFILCOUNTRY , "Austria" ) OR LIMIT-TO ( AFFILCOUNTRY , "Portugal" ) OR LIMIT-TO ( AFFILCOUNTRY , "Greece" ) OR LIMIT-TO ( AFFILCOUNTRY , "Finland" ) OR LIMIT-TO ( AFFILCOUNTRY , "Czech Republic" ) OR LIMIT-TO ( AFFILCOUNTRY , "Norway" ) OR LIMIT-TO ( AFFILCOUNTRY , "Hungary" ) OR LIMIT-TO ( AFFILCOUNTRY , "Ireland" ) OR LIMIT-TO ( AFFILCOUNTRY , "Romania" ) OR LIMIT-TO ( AFFILCOUNTRY , "Ukraine" ) OR LIMIT-TO ( AFFILCOUNTRY , "Belarus" ) OR LIMIT-TO ( AFFILCOUNTRY , "Slovakia" ) OR LIMIT-TO ( AFFILCOUNTRY , "Serbia" ) OR LIMIT-TO ( AFFILCOUNTRY , "Croatia" ) OR LIMIT-TO ( AFFILCOUNTRY , "Bulgaria" ) OR LIMIT-TO ( AFFILCOUNTRY , "Slovenia" ) OR LIMIT-TO ( AFFILCOUNTRY , "Russia" ) OR LIMIT-TO ( AFFILCOUNTRY , "Montenegro" ) OR LIMIT-TO ( AFFILCOUNTRY , "Albania" ) OR LIMIT-TO ( AFFILCOUNTRY , "Malta" ) OR LIMIT-TO ( AFFILCOUNTRY , "North Macedonia" ) OR LIMIT-TO ( AFFILCOUNTRY , "Czechoslovakia" ) OR LIMIT-TO ( AFFILCOUNTRY , "Bosnia and Herzegovina" ) OR LIMIT-TO ( AFFILCOUNTRY , "Georgia" ) OR LIMIT-TO ( AFFILCOUNTRY , "Iceland" ) OR LIMIT-TO ( AFFILCOUNTRY , "Germany (Democratic Republic, DDR)" ) OR LIMIT-TO ( AFFILCOUNTRY , "Cyprus" ) OR LIMIT-TO ( AFFILCOUNTRY , "Lithuania" ) OR LIMIT-TO ( AFFILCOUNTRY , "Estonia" ) ) |
| AND |  |
| #2 outcome | ( TITLE ( thiamin OR thiamine OR anevrin OR "vitamin B1" ) AND TITLE ( status OR deficiency OR beriberi OR "beri beri" OR ThDP OR TPP OR ThMP OR ThTP OR ETK OR "erythrocyte transketolase" OR "transketolase activity" OR ETKA ) |
| AND NOT |  |
|  | ( SUBJAREA ( AGRI OR VETE OR ARTS OR EART OR PSYC OR MATH OR BUSI OR ECON OR DECI OR DENT OR COMP OR PHYS OR ENER OR ENVI OR ENGI OR MATE OR CENG ) )) |

**NEWCASTLE - OTTAWA QUALITY ASSESSMENT SCALE**

**ADAPTED FOR CROSS SECTIONAL STUDIES**

**Selection:**

1. Representativeness of the sample:
   1. Truly representative of the average in the target population. * (all subjects or random sampling)
   2. Somewhat representative of the average in the target group. * (non-random sampling)
   3. Selected group of users/convenience sample.
   4. No description of the derivation of the included subjects.
2. Sample size:
   1. Justified and satisfactory (including sample size calculation). *
   2. Not justified.
   3. No information provided
3. Non-respondents:
   1. Proportion of target sample recruited attains pre-specified target or basic summary of non-respondent characteristics in sampling frame recorded. *
   2. Unsatisfactory recruitment rate, no summary data on non-respondents.
   3. No information provided
4. Ascertainment of the exposure (risk factor):
   1. Lab measurements/health registry/clinic registers/hospital records only. **
   2. Personal recall and hospital records. *
   3. Personal recall only.

**Comparability:** (Maximum 2 stars)

1. Comparability of subjects in different outcome groups on the basis of design or analysis. Confounding factors controlled.
   1. Data/ results adjusted for relevant predictors/risk factors/confounders e.g. age, sex, time since vaccination, etc. **
   2. Data/results not adjusted for all relevant confounders/risk factors/information not provided.

**Outcome:**

1. Assessment of outcome:
   1. Independent blind assessment using objective validated laboratory methods. **
   2. Unblinded assessment using objective validated laboratory methods. **
   3. Used non-standard or non-validated laboratory methods with gold standard. *
   4. No description/non-standard laboratory methods used.
2. Statistical test:
   1. Statistical test used to analyse the data clearly described, appropriate and measures of association presented including confidence intervals and probability level (p value). *
   2. Statistical test not appropriate, not described or incomplete.

This scale has been adapted from the Newcastle-Ottawa Quality Assessment Scale for cohort studies to provide quality assessment of cross sectional studies [1].

| **Supplemental table.** Risk of Bias assessment Newcastle-Ottawa Scale adapted for cross-sectional studies [1]. | | | | | | | | |
| --- | --- | --- | --- | --- | --- | --- | --- | --- |
| First author, year | Selection | | | | Comparability of subjects in different outcome groups on the basis of design or analysis. Confounding factors controlled. | Outcome | |  |
|  | Representativeness of the sample | Sample size | Non-respondents | Ascertainment of the exposure | Assessment of outcome | Statistical test | Total score |
| Ortega et al., 2004 | 0 | 0 | 0 | 2 | 2 | 2 | 1 | 7 |
| Sánchez et al., 1999 | 0 | 0 | 0 | 2 | 2 | 2 | 1 | 7 |
| Elmadfa et al., 2001 | 0 | 0 | 0 | 2 | 2 | 2 | 1 | 7 |
| Fabian et al., 2008 | 0 | 0 | 0 | 2 | 2 | 2 | 1 | 7 |
| Malara et al., 2013 | 0 | 0 | 0 | 2 | 2 | 2 | 1 | 7 |
| Jermendy, 2006 | 0 | 0 | 0 | 2 | 2 | 2 | 1 | 7 |
| Mataix et al., 2003 | 1 | 1 | 1 | 2 | 2 | 2 | 1 | 10 |
| Boni et al., 1980 | 0 | 0 | 0 | 2 | 0 | 2 | 1 | 5 |
| Hötzel & Bitsch, 1976 | 0 | 0 | 0 | 2 | 0 | 2 | 1 | 5 |
| Mancinelli et al., 2003 | 0 | 0 | 0 | 2 | 2 | 2 | 1 | 7 |
| Talwar et al., 2000 | 0 | 0 | 0 | 2 | 2 | 2 | 1 | 7 |
| Schrijver et al., 1982 | 0 | 0 | 0 | 2 | 0 | 2 | 1 | 5 |
| Herve et al., 1995 | 0 | 0 | 0 | 2 | 2 | 2 | 1 | 7 |
| Churuangsuk et al., 2024 | 0 | 0 | 1 | 2 | 2 | 2 | 1 | 8 |
| Verstraete & Stove, 2021 | 0 | 0 | 0 | 2 | 0 | 2 | 1 | 5 |
| Jones et. Al., 2023 | 1 | 0 | 0 | 2 | 2 | 2 | 1 | 8 |
| Lynch, 1995 | 0 | 0 | 0 | 2 | 0 | 2 | 1 | 5 |
| Körner et al., 2009 | 0 | 0 | 0 | 2 | 0 | 2 | 1 | 5 |
| Tallaksen et al., 1991 | 0 | 0 | 0 | 2 | 0 | 2 | 1 | 5 |
| Evaluation of cross-sectional studies: Very Good Studies: 9-10 points; Good Studies: 7-8 points; Satisfactory Studies: 5-6 points; Unsatisfactory Studies: 0 to 4 points. | | | | | | | | |

**SOURCES**

1. Herzog R, Álvarez-Pasquin MJ, Díaz C, et al (2013) Are healthcare workers’ intentions to vaccinate related to their knowledge, beliefs and attitudes? a systematic review. BMC Public Health 13:154. https://doi.org/10.1186/1471-2458-13-154
